# Supplementary material for: Rutile-type metal dioxide (110) surfaces for the cyclic oxidation of methane to methanol
Source: Royal Society of Chemistry journal article supplement (doi:10.1039/d4ma00827h), 2024-01-01
Supplement: d4ma00827h2.pdf [file d4ma00827h2.pdf]

## *Electronic Supplementary Information*

# **Rutile-Type Metal Dioxide (110) Surfaces for the Cyclic Oxidation of Methane to Methanol**

Farrel Dzaudan Naufal,<sup>a</sup> Hasna Afifah,<sup>b</sup> Marleni Wirmas,<sup>b</sup> Mohammad Kemal Agusta,<sup>a,c</sup> Adhitya Gandaryus Saputro,<sup>a,c</sup> Hadi Teguh Yudistira,<sup>d</sup> Aleksandar Staykov,<sup>e</sup> Kazunari Yoshizawa,<sup>f</sup> and Muhammad Haris Mahyuddin,<sup>\*,a,c</sup>

<sup>a</sup> Quantum and Nano Technology Research Group, Faculty of Industrial Technology, Institut Teknologi Bandung, Jl. Ganesha 10 Bandung 40132, Indonesia

<sup>b</sup> Doctoral Program of Engineering Physics, Faculty of Industrial Technology, Institut Teknologi Bandung, Jl. Ganesha 10 Bandung 40132, Indonesia

<sup>c</sup> Research Center for Nanoscience and Nanotechnology, Institut Teknologi Bandung, Jl. Ganesha 10 Bandung 40132, Indonesia

<sup>d</sup> Mechanical Engineering Study Program, Institut Teknologi Sumatera, Way Hui, South Lampung 35365, Indonesia

<sup>e</sup> International Institute for Carbon-Neutral Energy Research, Kyushu University, Fukuoka 819-0395, Japan

<sup>f</sup> Fukui Institute for Fundamental Chemistry, Kyoto University, Sakyo-ku, Kyoto 606-8103, Japan

\* To whom all correspondences should be addressed

(e-mail: mahyuddin133[at]itb.ac.id).

## Table of Contents:

- Figure S1** Surface formation energy of clean  $\text{IrO}_2(110)$ ,  $\beta\text{-PtO}_2(110)$ , and  $\beta\text{-MnO}_2(110)$  surfaces calculated using different cut-off energy values.
- Figure S2** Relative energies of the  $\text{CH}_4$ ,  $\text{Mn}\cdots\bullet\text{CH}_3+\text{H}$  or  $\text{Pt}-\text{CH}_3+\text{H}$ , and  $\text{CH}_3\text{OH}$  adsorption on the (a)  $\beta\text{-MnO}_2(110)$  and (b)  $\beta\text{-PtO}_2(110)$  surfaces calculated using different  $U_{\text{eff}}$  values.
- Figure S3** Energy diagrams (in eV) of  $\text{H}_2\text{O}_2$  decomposition on the stoichiometric  $\beta\text{-MnO}_2(110)$  surface via the O–O and O–H bond scission pathways.
- Figure S4** Geometrical structures of each reaction step of the methane to methanol conversion on the stoichiometric  $\text{IrO}_2(110)$ ,  $\beta\text{-PtO}_2(110)$ , and  $\beta\text{-MnO}_2(110)$  surfaces.
- Figure S5** –pCOHP plots for M–O bond of the  $\text{CH}_3\text{OH}$  adsorbed on (a)  $\text{IrO}_2(110)$ , (b)  $\beta\text{-PtO}_2(110)$ , and (c)  $\beta\text{-MnO}_2(110)$  surfaces. Positive and negative –pCOHP values indicate bonding and antibonding interactions, respectively.
- Figure S6** Geometrical parameters of the formed methanol adsorbed on the stoichiometric (a, d)  $\text{IrO}_2(110)$ , (b, e)  $\beta\text{-PtO}_2(110)$ , and (c, f)  $\beta\text{-MnO}_2(110)$  surfaces, and (g) that in the gas phase.
- Figure S7** Plots of  $E_a$  vs.  $\Delta E$  for the (a) C–H activation and (b) HO– $\text{CH}_3$  formation steps.
- Figure S8** Plots of  $E_a$  of (a) C–H activation and (b) HO– $\text{CH}_3$  formation steps against the O p-band center of the clean  $\text{IrO}_2(110)$ ,  $\beta\text{-PtO}_2(110)$ , and  $\beta\text{-MnO}_2(110)$  surfaces.
- Figure S9** Comparison of reaction energies for the  $\text{CH}_3\text{OH}^*$ ,  $\text{CH}_2\text{O}^*$ , and  $\text{C}_2\text{H}_6\text{O}^*$  formation, showing a higher stability of  $\text{CH}_3\text{OH}$  formation as compared to the formation of the other two side products as a result of overoxidation.
- Figure S10** Total DOS of  $\text{CH}_4$  and  $\bullet\text{CH}_3$  in the gas phase (isolated in big vacuum).
- Figure S11** Energy diagrams (in eV) of  $\text{H}_2\text{O}_2$  decomposition on the reduced  $\beta\text{-MnO}_2(110)$  surface via the O–O and O–H bond scission pathways.
- Figure S12** Energy diagrams (in eV) of H– $\text{CH}_3$  bond scission on the reduced  $\beta\text{-MnO}_2(110)$  surface via a mechanism that leads to the Mn– $\text{CH}_3$  formation.
- Figure S13** Energy diagram (in eV) of  $\text{O}_2$  dissociation on the reduced  $\beta\text{-MnO}_2(110)$ , forming back the fresh stoichiometric  $\beta\text{-MnO}_2(110)$  surface.



**Figure S1.** Surface formation energy of clean IrO<sub>2</sub>(110),  $\beta$ -PtO<sub>2</sub>(110), and  $\beta$ -MnO<sub>2</sub>(110) surfaces calculated using different cut-off energy values.



**Figure S2.** Relative energies of the CH<sub>4</sub>, Mn...•CH<sub>3</sub>+H or Pt-CH<sub>3</sub>+H, and CH<sub>3</sub>OH adsorption on the (a)  $\beta$ -MnO<sub>2</sub>(110) and (b)  $\beta$ -PtO<sub>2</sub>(110) surfaces calculated using different  $U_{\text{eff}}$  values.

The use of  $U_{\text{eff}} = 5.1$  and  $7.5$  eV for Mn 3d and Pt 5d orbitals, respectively, is chosen according to two thorough investigations reported by Tompsett et al. (*J. Am. Chem. Soc.* 2014, 136, 4, 1418–1426) and Tsuji et al. (*ACS Omega* 2021, 6, 21, 13858–13869). In these reports, the authors carefully tested various  $U_{\text{eff}}$  values and found optimized values that can correctly treat the strong correlation effects of Mn<sup>4+</sup>, Mn<sup>3+</sup>, Pt<sup>4+</sup>, and Pt<sup>3+</sup> involved in the present study. Figures above also show that the use of different  $U$  values insignificantly alters the relative adsorption energies.



**Figure S3.** Energy diagrams (in eV) of  $\text{H}_2\text{O}_2$  decomposition on the stoichiometric  $\beta\text{-MnO}_2(110)$  surface via the O-O and O-H bond scission pathways.



**Figure S4.** Geometrical structures of each reaction step of the methane to methanol conversion on the stoichiometric IrO<sub>2</sub>(110),  $\beta$ -PtO<sub>2</sub>(110), and  $\beta$ -MnO<sub>2</sub>(110) surfaces.



**Figure S5.**  $-p\text{COHP}$  plots for M–O bond of the  $\text{CH}_3\text{OH}$  adsorbed on (a)  $\text{IrO}_2(110)$ , (b)  $\beta\text{-PtO}_2(110)$ , and (c)  $\beta\text{-MnO}_2(110)$  surfaces. Positive and negative  $-p\text{COHP}$  values indicate bonding and antibonding interactions, respectively.



**Figure S6.** Geometrical parameters of the formed methanol adsorbed on the stoichiometric (a, d)  $\text{IrO}_2(110)$ , (b, e)  $\beta\text{-PtO}_2(110)$ , and (c, f)  $\beta\text{-MnO}_2(110)$  surfaces, and (g) that in the gas phase.



**Figure S7.** Plots of  $E_a$  vs.  $\Delta E$  for the (a) C–H activation and (b) HO–CH<sub>3</sub> formation steps.

In plot (a), since the C–H activation mechanism on the  $\beta$ -MnO<sub>2</sub>(110) (homolytic mechanism) is different from that on the IrO<sub>2</sub>(110) and  $\beta$ -PtO<sub>2</sub>(110) (heterolytic mechanism), we cannot include the  $E_a$  and  $\Delta E$  of the  $\beta$ -MnO<sub>2</sub>(110) to the plot. Thus, the BEP relation in this case (with only two points of data) seems unreliable.



**Figure S8.** Plots of  $E_a$  of (a) C–H activation and (b) HO–CH<sub>3</sub> formation steps against the O p-band center of the clean IrO<sub>2</sub>(110),  $\beta$ -PtO<sub>2</sub>(110), and  $\beta$ -MnO<sub>2</sub>(110) surfaces.

In plot (a), since the C–H activation mechanism on the  $\beta$ -MnO<sub>2</sub>(110) (homolytic mechanism) is different from that on the IrO<sub>2</sub>(110) and  $\beta$ -PtO<sub>2</sub>(110) (heterolytic mechanism), we cannot include the  $E_a$ (C–H) and O p-band center of the  $\beta$ -MnO<sub>2</sub>(110) to the plot. Thus, the relation in this case (with only two points of data) seems unreliable. In plot (b), the coefficient of determination ( $R^2$ ), is found to be low, suggesting a low dependency of the HO–CH<sub>3</sub> formation on O p-band center.



**Figure S9.** Comparison of reaction energies for the CH<sub>3</sub>OH\*, CH<sub>2</sub>O\*, and C<sub>2</sub>H<sub>6</sub>O\* formation, showing a higher stability of CH<sub>3</sub>OH formation as compared to the formation of the other two side products as a result of overoxidation.



**Figure S10.** Total DOS of CH<sub>4</sub> and •CH<sub>3</sub> in the gas phase (isolated in big vacuum).



**Figure S11.** Energy diagrams (in eV) of H<sub>2</sub>O<sub>2</sub> decomposition on the reduced  $\beta$ -MnO<sub>2</sub>(110) surface via the O–O and O–H bond scission pathways.



**Figure S12.** Energy diagrams (in eV) of H–CH<sub>3</sub> bond scission on the reduced  $\beta$ -MnO<sub>2</sub>(110) surface via a mechanism that leads to the Mn–CH<sub>3</sub> formation.



**Figure S13.** Energy diagram (in eV) of O<sub>2</sub> dissociation on the reduced  $\beta\text{-MnO}_2(110)$ , forming back the fresh stoichiometric  $\beta\text{-MnO}_2(110)$  surface.
